# Supplementary material for: Storage Stability of Blood Samples for miRNAs in Glycosylated Extracellular Vesicles
Source: MDPI journal article supplement (doi:10.3390/molecules29010103), 2023-12-23
Supplement: s1 [file s1]

**Table S1 The sequence of primers and probes.**

| Name                    | Sequence                                                                                   |
|-------------------------|--------------------------------------------------------------------------------------------|
| RT primer               | CGACTCGATCCAGTCTCAGGGTCCGAGGTATT<br>CGATCCTAACCCTCTCCTCGGTATCGAGTCGC<br>ACTTTTTTTTTTTTTTVN |
| Forward primer-let-7a   | GCGCGTGAGGTAGTAGGTTGTATAGT                                                                 |
| Forward primer-miR-16   | GCCCGTAGCAGCACGTAAATATT                                                                    |
| Forward primer-miR-125a | GCGCTCCCTGAGACCCTTT                                                                        |
| Forward primer-miR-150  | GCGCATCTCCCAACCCTT                                                                         |
| Reverse primer          | CAGTCTCAGGGTCCGAGGTATTC                                                                    |
| Probe                   | TCGGTATCGAGTCGCACT                                                                         |

**Table S2 Degradation rate of four glycosylated EV miRNAs in three different serum separation methods at 8h.**

| Treatments\miRNAs | let-7a | miR-16 | miR-125a | miR-150 |
|-------------------|--------|--------|----------|---------|
| Treatment A       | 56%    | 36%    | 66%      | 77%     |
| Treatment B       | 38%    | 5%     | 55%      | 58%     |
| Treatment C       | 51%    | 13%    | 70%      | 65%     |

Treatment A: two-step centrifugation, Treatment B: rapid acceleration centrifugation,  
Treatment C: slow acceleration centrifugation,

**Table S3 Degradation rate of four glycosylated EV miRNAs under different storage time after serum separation at 25°C.**

| Hours(h)\miRNAs | let-7a | miR-16 | miR-125a | miR-150 |
|-----------------|--------|--------|----------|---------|
| 0               | 0      | 0      | 0        | 0       |
| 4               | 24%    | 22%    | 38%      | 48%     |
| 8               | 50%    | 21%    | 42%      | 63%     |
| 12              | 58%    | 28%    | 48%      | 70%     |
| 24              | 78%    | 27%    | 82%      | 85%     |

**Table S4 Degradation rate of four glycosylated EV miRNAs under different storage time after serum separation at 37°C.**

| Hours(h)\miRNAs | let-7a | miR-16 | miR-125a | miR-150 |
|-----------------|--------|--------|----------|---------|
| 0               | 0      | 0      | 0        | 0       |
| 2               | 50%    | 22%    | 29%      | 44%     |
| 4               | 75%    | 48%    | 63%      | 58%     |
| 6               | 83%    | 54%    | 76%      | 74%     |
| 8               | 92%    | 77%    | 89%      | 87%     |

|    |     |     |     |     |
|----|-----|-----|-----|-----|
| 10 | 92% | 76% | 89% | 83% |
| 12 | 91% | 74% | 88% | 83% |

**Table S5 Degradation rate of four glycosylated EV miRNAs under different storage time after serum separation at 4°C.**

| Days(d)\miRNAs | let-7a | miR-16 | miR-125a | miR-150 |
|----------------|--------|--------|----------|---------|
| 0              | 0      | 0      | 0        | 0       |
| 1              | 47%    | 38%    | 46%      | 43%     |
| 2              | 58%    | 38%    | 55%      | 55%     |
| 3              | 69%    | 55%    | 69%      | 69%     |
| 4              | 66%    | 63%    | 64%      | 61%     |
| 5              | 78%    | 78%    | 77%      | 78%     |
| 6              | 76%    | 80%    | 75%      | 75%     |

**Table S6 Relative expression levels of four glycosylated EV miRNAs at 12h using three groups of protectants at 25°C.**

| miRNAs\groups | Protectant 1 | Protectant 2 | Protectant 3 | Control group |
|---------------|--------------|--------------|--------------|---------------|
| let-7a        | 92%          | 98%          | 56%          | 47%           |
| miR-16        | 89%          | 102%         | 56%          | 60%           |
| miR-125a      | 109%         | 89%          | 47%          | 42%           |
| miR-150       | 81%          | 98%          | 32%          | 27%           |
| Average       | 93%          | 97%          | 47%          | 44%           |

**Table S7 Statistical analysis information of four glycosylated EV miRNAs in three different serum separation methods.**

| miRNAs   | Comparisons                       | Mean 1 | Mean 2 | Mean Diff. | 95.00% CI of diff. | Below threshold? | Summary | Adjusted P Value |
|----------|-----------------------------------|--------|--------|------------|--------------------|------------------|---------|------------------|
| let-7a   | Treatment A-0h vs. Treatment B-0h | 1.082  | 0.923  | 0.1594     | -0.1987 to 0.5175  | No               | ns      | 0.7951           |
|          | Treatment A-0h vs. Treatment C-0h | 1.082  | 1.024  | 0.05793    | -0.3219 to 0.4377  | No               | ns      | 0.9979           |
|          | Treatment B-0h vs. Treatment C-0h | 0.923  | 1.024  | -0.1014    | -0.4812 to 0.2784  | No               | ns      | 0.9724           |
|          | Treatment A-8h vs. Treatment B-8h | 0.4804 | 0.5718 | -0.09143   | -0.4593 to 0.2765  | No               | ns      | 0.9799           |
|          | Treatment A-8h vs. Treatment C-8h | 0.4804 | 0.5056 | -0.02528   | -0.3834 to 0.3328  | No               | ns      | >0.9999          |
|          | Treatment B-8h vs. Treatment C-8h | 0.5718 | 0.5056 | 0.06614    | -0.3018 to 0.4341  | No               | ns      | 0.9954           |
|          | Treatment A-0h vs. Treatment A-8h | 1.082  | 0.4804 | 0.602      | 0.2439 to 0.9601   | Yes              | ****    | <0.0001          |
|          | Treatment B-0h vs. Treatment B-8h | 0.923  | 0.5718 | 0.3512     | -0.01674 to 0.7191 | No               | ns      | 0.0707           |
|          | Treatment C-0h vs. Treatment C-8h | 1.024  | 0.5056 | 0.5187     | 0.1389 to 0.8986   | Yes              | **      | 0.0016           |
| miR-16   | Treatment A-0h vs. Treatment B-0h | 1.071  | 0.8407 | 0.2307     | -0.1274 to 0.5888  | No               | ns      | 0.4334           |
|          | Treatment A-0h vs. Treatment C-0h | 1.071  | 1.048  | 0.02305    | -0.3449 to 0.3910  | No               | ns      | >0.9999          |
|          | Treatment B-0h vs. Treatment C-0h | 0.8407 | 1.048  | -0.2077    | -0.5756 to 0.1602  | No               | ns      | 0.5832           |
|          | Treatment A-8h vs. Treatment B-8h | 0.6904 | 0.8025 | -0.112     | -0.4800 to 0.2559  | No               | ns      | 0.9517           |
|          | Treatment A-8h vs. Treatment C-8h | 0.6904 | 0.9089 | -0.2184    | -0.6075 to 0.1706  | No               | ns      | 0.5889           |
|          | Treatment B-8h vs. Treatment C-8h | 0.8025 | 0.9089 | -0.1064    | -0.4862 to 0.2734  | No               | ns      | 0.9661           |
|          | Treatment A-0h vs. Treatment A-8h | 1.071  | 0.6904 | 0.381      | 0.01307 to 0.7489  | Yes              | *       | 0.0376           |
|          | Treatment B-0h vs. Treatment B-8h | 0.8407 | 0.8025 | 0.03822    | -0.3199 to 0.3963  | No               | ns      | 0.9996           |
|          | Treatment C-0h vs. Treatment C-8h | 1.048  | 0.9089 | 0.1395     | -0.2496 to 0.5286  | No               | ns      | 0.9067           |
| miR-125a | Treatment A-0h vs. Treatment B-0h | 1.045  | 0.8533 | 0.1913     | -0.1668 to 0.5493  | No               | ns      | 0.6406           |
|          | Treatment A-0h vs. Treatment C-0h | 1.045  | 1.023  | 0.02139    | -0.3921 to 0.4349  | No               | ns      | >0.9999          |
|          | Treatment B-0h vs. Treatment C-0h | 0.8533 | 1.023  | -0.1699    | -0.5834 to 0.2436  | No               | ns      | 0.8448           |

|         |                                   |        |        |          |                    |     |      |         |
|---------|-----------------------------------|--------|--------|----------|--------------------|-----|------|---------|
|         | Treatment A-8h vs. Treatment B-8h | 0.3588 | 0.387  | -0.02824 | -0.3863 to 0.3299  | No  | ns   | >0.9999 |
|         | Treatment A-8h vs. Treatment C-8h | 0.3588 | 0.308  | 0.05075  | -0.3073 to 0.4088  | No  | ns   | 0.9985  |
|         | Treatment B-8h vs. Treatment C-8h | 0.387  | 0.308  | 0.07899  | -0.2791 to 0.4371  | No  | ns   | 0.9882  |
|         | Treatment A-0h vs. Treatment A-8h | 1.045  | 0.3588 | 0.6858   | 0.3277 to 1.044    | Yes | **** | <0.0001 |
|         | Treatment B-0h vs. Treatment B-8h | 0.8533 | 0.387  | 0.4663   | 0.1082 to 0.8244   | Yes | **   | 0.0032  |
|         | Treatment C-0h vs. Treatment C-8h | 1.023  | 0.308  | 0.7152   | 0.3017 to 1.129    | Yes | **** | <0.0001 |
|         | Treatment A-0h vs. Treatment B-0h | 1.095  | 0.822  | 0.2735   | -0.08463 to 0.6316 | No  | ns   | 0.2433  |
|         | Treatment A-0h vs. Treatment C-0h | 1.095  | 1.056  | 0.03992  | -0.3736 to 0.4534  | No  | ns   | 0.9998  |
|         | Treatment B-0h vs. Treatment C-0h | 0.822  | 1.056  | -0.2336  | -0.6470 to 0.1799  | No  | ns   | 0.5825  |
|         | Treatment A-8h vs. Treatment B-8h | 0.2514 | 0.345  | -0.09365 | -0.5501 to 0.3628  | No  | ns   | 0.9916  |
| miR-150 | Treatment A-8h vs. Treatment C-8h | 0.2514 | 0.3644 | -0.113   | -0.5021 to 0.2761  | No  | ns   | 0.9604  |
|         | Treatment B-8h vs. Treatment C-8h | 0.345  | 0.3644 | -0.01935 | -0.4660 to 0.4273  | No  | ns   | >0.9999 |
|         | Treatment A-0h vs. Treatment A-8h | 1.095  | 0.2514 | 0.8441   | 0.4643 to 1.224    | Yes | **** | <0.0001 |
|         | Treatment B-0h vs. Treatment B-8h | 0.822  | 0.345  | 0.477    | 0.03839 to 0.9155  | Yes | *    | 0.0243  |
|         | Treatment C-0h vs. Treatment C-8h | 1.056  | 0.3644 | 0.6912   | 0.2692 to 1.113    | Yes | **** | <0.0001 |

\*P < 0.05, \*\*P < 0.01, \*\*\*\*P < 0.0001, ns: nonsignificant.

**Table S8 Statistical analysis information of four glycosylated EV miRNAs under different storage time before serum separation.**

| Temperature | miRNAs | Comparisons | Mean 1 | Mean 2 | Mean Diff. | 95.00% CI of diff. | Below threshold? | Summary | Adjusted P Value |
|-------------|--------|-------------|--------|--------|------------|--------------------|------------------|---------|------------------|
| 4°C         | let-7a | 0h vs. 4h   | 1.041  | 1.646  | -0.6051    | -1.560 to 0.3494   | No               | ns      | 0.3542           |
|             |        | 0h vs. 8h   | 1.041  | 2.619  | -1.578     | -2.590 to -0.5653  | Yes              | ***     | 0.0007           |

|      |          |            |       |        |          |                   |     |      |         |
|------|----------|------------|-------|--------|----------|-------------------|-----|------|---------|
| 25°C | miR-16   | 0h vs. 12h | 1.041 | 2.511  | -1.47    | -2.424 to -0.5153 | Yes | ***  | 0.0008  |
|      |          | 0h vs. 24h | 1.041 | 3.038  | -1.997   | -2.951 to -1.042  | Yes | **** | <0.0001 |
|      |          | 0h vs. 48h | 1.041 | 3.131  | -2.089   | -3.044 to -1.135  | Yes | **** | <0.0001 |
|      |          | 0h vs. 4h  | 1.023 | 1.29   | -0.2669  | -1.220 to 0.6864  | No  | ns   | 0.9266  |
|      |          | 0h vs. 8h  | 1.023 | 1.703  | -0.6797  | -1.633 to 0.2736  | No  | ns   | 0.2477  |
|      |          | 0h vs. 12h | 1.023 | 1.512  | -0.4887  | -1.442 to 0.4646  | No  | ns   | 0.5547  |
|      |          | 0h vs. 24h | 1.023 | 1.811  | -0.7875  | -1.741 to 0.1658  | No  | ns   | 0.1397  |
|      |          | 0h vs. 48h | 1.023 | 1.65   | -0.6267  | -1.580 to 0.3266  | No  | ns   | 0.3186  |
|      |          | 0h vs. 4h  | 1.019 | 0.8442 | 0.1746   | -0.7787 to 1.128  | No  | ns   | 0.9871  |
|      |          | 0h vs. 8h  | 1.019 | 0.8344 | 0.1844   | -0.7689 to 1.138  | No  | ns   | 0.9837  |
|      | miR-125a | 0h vs. 12h | 1.019 | 0.7241 | 0.2947   | -0.6586 to 1.248  | No  | ns   | 0.8946  |
|      |          | 0h vs. 24h | 1.019 | 0.5124 | 0.5065   | -0.4468 to 1.460  | No  | ns   | 0.521   |
|      |          | 0h vs. 48h | 1.019 | 0.5046 | 0.5142   | -0.4391 to 1.468  | No  | ns   | 0.5066  |
|      |          | 0h vs. 4h  | 1.024 | 0.8233 | 0.2004   | -0.7529 to 1.154  | No  | ns   | 0.9767  |
|      |          | 0h vs. 8h  | 1.024 | 1.175  | -0.1517  | -1.105 to 0.8016  | No  | ns   | 0.9934  |
|      | miR-150  | 0h vs. 12h | 1.024 | 1.169  | -0.1453  | -1.099 to 0.8080  | No  | ns   | 0.9944  |
|      |          | 0h vs. 24h | 1.024 | 1.428  | -0.4045  | -1.358 to 0.5488  | No  | ns   | 0.7165  |
|      |          | 0h vs. 48h | 1.024 | 1.511  | -0.4875  | -1.441 to 0.4658  | No  | ns   | 0.5569  |
|      |          | 0h vs. 2h  | 1.04  | 1.159  | -0.1193  | -0.6836 to 0.4450 | No  | ns   | 0.9762  |
|      | let-7a   | 0h vs. 4h  | 1.04  | 0.9111 | 0.1285   | -0.4359 to 0.6928 | No  | ns   | 0.9675  |
|      |          | 0h vs. 6h  | 1.04  | 0.8139 | 0.2257   | -0.3387 to 0.7900 | No  | ns   | 0.7595  |
|      |          | 0h vs. 8h  | 1.04  | 1.032  | 0.007954 | -0.5564 to 0.5723 | No  | ns   | >0.9999 |
|      |          | 0h vs. 12h | 1.04  | 0.8582 | 0.1813   | -0.3830 to 0.7456 | No  | ns   | 0.8796  |

|          |            |       |        |          |                   |    |    |        |
|----------|------------|-------|--------|----------|-------------------|----|----|--------|
| miR-16   | 0h vs. 2h  | 1.021 | 1.311  | -0.2903  | -0.8546 to 0.2740 | No | ns | 0.5515 |
|          | 0h vs. 4h  | 1.021 | 1.177  | -0.1561  | -0.7204 to 0.4082 | No | ns | 0.9299 |
|          | 0h vs. 6h  | 1.021 | 1.207  | -0.1861  | -0.7504 to 0.3782 | No | ns | 0.8683 |
|          | 0h vs. 8h  | 1.021 | 1.484  | -0.4634  | -1.028 to 0.1010  | No | ns | 0.1436 |
|          | 0h vs. 12h | 1.021 | 1.353  | -0.3322  | -0.8966 to 0.2321 | No | ns | 0.4226 |
| miR-125a | 0h vs. 2h  | 1.021 | 1.22   | -0.1997  | -0.7640 to 0.3646 | No | ns | 0.8339 |
|          | 0h vs. 4h  | 1.021 | 1.045  | -0.02426 | -0.5886 to 0.5401 | No | ns | 0.9999 |
|          | 0h vs. 6h  | 1.021 | 0.899  | 0.1216   | -0.4427 to 0.6860 | No | ns | 0.9741 |
|          | 0h vs. 8h  | 1.021 | 0.8732 | 0.1474   | -0.4169 to 0.7118 | No | ns | 0.9436 |
|          | 0h vs. 12h | 1.021 | 0.7116 | 0.309    | -0.2553 to 0.8734 | No | ns | 0.4922 |
| miR-150  | 0h vs. 2h  | 1.009 | 0.8512 | 0.158    | -0.4064 to 0.7223 | No | ns | 0.9267 |
|          | 0h vs. 4h  | 1.009 | 0.9578 | 0.05136  | -0.5130 to 0.6157 | No | ns | 0.9996 |
|          | 0h vs. 6h  | 1.009 | 0.7622 | 0.247    | -0.3174 to 0.8113 | No | ns | 0.6926 |
|          | 0h vs. 8h  | 1.009 | 0.5957 | 0.4134   | -0.1509 to 0.9777 | No | ns | 0.2258 |
|          | 0h vs. 12h | 1.009 | 0.7195 | 0.2897   | -0.2747 to 0.8540 | No | ns | 0.5537 |

\*\*\*P < 0.001, \*\*\*\*P < 0.0001, ns: nonsignificant.

**Table S9 Statistical analysis information of four glycosylated EV miRNAs under different storage time after serum separation.**

| Temperature | miRNAs | Comparisons | Mean 1 | Mean 2 | Mean Diff. | 95.00% CI of diff. | Below threshold? | Summary | Adjusted P Value |
|-------------|--------|-------------|--------|--------|------------|--------------------|------------------|---------|------------------|
| 37°C        | let-7a | 0h vs. 2h   | 1.018  | 0.5068 | 0.5115     | 0.1511 to 0.8719   | Yes              | **      | 0.0022           |
|             |        | 0h vs. 4h   | 1.018  | 0.2547 | 0.7636     | 0.4033 to 1.124    | Yes              | ****    | <0.0001          |

|      |          |            |       |         |        |                    |     |      |         |
|------|----------|------------|-------|---------|--------|--------------------|-----|------|---------|
| 25°C | miR-16   | 0h vs. 6h  | 1.018 | 0.1697  | 0.8486 | 0.4883 to 1.209    | Yes | **** | <0.0001 |
|      |          | 0h vs. 8h  | 1.018 | 0.07972 | 0.9386 | 0.5782 to 1.299    | Yes | **** | <0.0001 |
|      |          | 0h vs. 10h | 1.018 | 0.07864 | 0.9397 | 0.5793 to 1.300    | Yes | **** | <0.0001 |
|      |          | 0h vs. 12h | 1.018 | 0.08828 | 0.93   | 0.5697 to 1.290    | Yes | **** | <0.0001 |
|      |          | 0h vs. 2h  | 1.019 | 0.7946  | 0.2245 | -0.1359 to 0.5849  | No  | ns   | 0.3789  |
|      |          | 0h vs. 4h  | 1.019 | 0.5326  | 0.4865 | 0.1261 to 0.8468   | Yes | **   | 0.004   |
|      |          | 0h vs. 6h  | 1.019 | 0.4707  | 0.5484 | 0.1880 to 0.9088   | Yes | ***  | 0.001   |
|      |          | 0h vs. 8h  | 1.019 | 0.2319  | 0.7872 | 0.4268 to 1.148    | Yes | **** | <0.0001 |
|      |          | 0h vs. 10h | 1.019 | 0.2464  | 0.7727 | 0.4123 to 1.133    | Yes | **** | <0.0001 |
|      |          | 0h vs. 12h | 1.019 | 0.2643  | 0.7548 | 0.3945 to 1.115    | Yes | **** | <0.0001 |
|      | miR-125a | 0h vs. 2h  | 1.023 | 0.7218  | 0.3009 | -0.05950 to 0.6612 | No  | ns   | 0.1346  |
|      |          | 0h vs. 4h  | 1.023 | 0.3742  | 0.6484 | 0.2880 to 1.009    | Yes | **** | <0.0001 |
|      |          | 0h vs. 6h  | 1.023 | 0.2419  | 0.7808 | 0.4204 to 1.141    | Yes | **** | <0.0001 |
|      |          | 0h vs. 8h  | 1.023 | 0.1105  | 0.9121 | 0.5517 to 1.272    | Yes | **** | <0.0001 |
|      |          | 0h vs. 10h | 1.023 | 0.1126  | 0.91   | 0.5496 to 1.270    | Yes | **** | <0.0001 |
|      | miR-150  | 0h vs. 12h | 1.023 | 0.1235  | 0.8991 | 0.5387 to 1.259    | Yes | **** | <0.0001 |
|      |          | 0h vs. 2h  | 1.01  | 0.5668  | 0.4429 | 0.08255 to 0.8033  | Yes | *    | 0.0101  |
|      |          | 0h vs. 4h  | 1.01  | 0.4268  | 0.5829 | 0.2225 to 0.9433   | Yes | ***  | 0.0004  |
|      |          | 0h vs. 6h  | 1.01  | 0.2603  | 0.7494 | 0.3890 to 1.110    | Yes | **** | <0.0001 |
|      |          | 0h vs. 8h  | 1.01  | 0.1311  | 0.8786 | 0.5182 to 1.239    | Yes | **** | <0.0001 |
|      |          | 0h vs. 10h | 1.01  | 0.1697  | 0.84   | 0.4797 to 1.200    | Yes | **** | <0.0001 |
|      |          | 0h vs. 12h | 1.01  | 0.1695  | 0.8402 | 0.4798 to 1.201    | Yes | **** | <0.0001 |
|      | let-7a   | 0h vs. 4h  | 1.026 | 0.7837  | 0.2422 | -0.02211 to 0.5065 | No  | ns   | 0.0807  |

|     |          |            |       |        |        |                    |     |      |         |
|-----|----------|------------|-------|--------|--------|--------------------|-----|------|---------|
| 4°C | miR-16   | 0h vs. 8h  | 1.026 | 0.5095 | 0.5164 | 0.2521 to 0.7807   | Yes | **** | <0.0001 |
|     |          | 0h vs. 12h | 1.026 | 0.4355 | 0.5904 | 0.3260 to 0.8547   | Yes | **** | <0.0001 |
|     |          | 0h vs. 24h | 1.026 | 0.2225 | 0.8033 | 0.5390 to 1.068    | Yes | **** | <0.0001 |
|     |          | 0h vs. 4h  | 1.003 | 0.7839 | 0.2195 | -0.04482 to 0.4838 | No  | ns   | 0.1278  |
|     |          | 0h vs. 8h  | 1.003 | 0.7889 | 0.2144 | -0.04986 to 0.4787 | No  | ns   | 0.1408  |
|     |          | 0h vs. 12h | 1.003 | 0.7243 | 0.2791 | 0.01476 to 0.5434  | Yes | *    | 0.0357  |
|     |          | 0h vs. 24h | 1.003 | 0.7306 | 0.2728 | 0.008489 to 0.5371 | Yes | *    | 0.0413  |
|     |          | 0h vs. 4h  | 1.016 | 0.6312 | 0.3844 | 0.1201 to 0.6487   | Yes | **   | 0.0024  |
|     | miR-125a | 0h vs. 8h  | 1.016 | 0.5905 | 0.4251 | 0.1608 to 0.6894   | Yes | ***  | 0.0008  |
|     |          | 0h vs. 12h | 1.016 | 0.5267 | 0.4889 | 0.2246 to 0.7532   | Yes | ***  | 0.0001  |
|     |          | 0h vs. 24h | 1.016 | 0.1813 | 0.8344 | 0.5700 to 1.099    | Yes | **** | <0.0001 |
|     |          | 0h vs. 4h  | 1.004 | 0.5232 | 0.481  | 0.2167 to 0.7453   | Yes | ***  | 0.0002  |
|     | miR-150  | 0h vs. 8h  | 1.004 | 0.3679 | 0.6362 | 0.3719 to 0.9005   | Yes | **** | <0.0001 |
|     |          | 0h vs. 12h | 1.004 | 0.3036 | 0.7005 | 0.4362 to 0.9648   | Yes | **** | <0.0001 |
|     |          | 0h vs. 24h | 1.004 | 0.1538 | 0.8504 | 0.5861 to 1.115    | Yes | **** | <0.0001 |
|     |          | 0d vs. 1d  | 1.064 | 0.5636 | 0.5    | 0.1726 to 0.8274   | Yes | ***  | 0.0009  |
|     | let-7a   | 0d vs. 2d  | 1.064 | 0.4511 | 0.6125 | 0.2851 to 0.9399   | Yes | **** | <0.0001 |
|     |          | 0d vs. 3d  | 1.064 | 0.3269 | 0.7367 | 0.4093 to 1.064    | Yes | **** | <0.0001 |
|     |          | 0d vs. 4d  | 1.064 | 0.3651 | 0.6984 | 0.3710 to 1.026    | Yes | **** | <0.0001 |
|     |          | 0d vs. 5d  | 1.064 | 0.2385 | 0.8251 | 0.4977 to 1.152    | Yes | **** | <0.0001 |
|     |          | 0d vs. 6d  | 1.064 | 0.2571 | 0.8065 | 0.4791 to 1.134    | Yes | **** | <0.0001 |
|     | miR-16   | 0d vs. 1d  | 1.016 | 0.6302 | 0.3857 | 0.05833 to 0.7131  | Yes | *    | 0.0147  |
|     |          | 0d vs. 2d  | 1.016 | 0.6281 | 0.3879 | 0.06046 to 0.7153  | Yes | *    | 0.014   |



|       |          |            |       |        |          |                   |     |      |         |
|-------|----------|------------|-------|--------|----------|-------------------|-----|------|---------|
| -20°C | miR-125a | 0d vs. 3d  | 1.016 | 0.4581 | 0.5578   | 0.2304 to 0.8852  | Yes | ***  | 0.0002  |
|       |          | 0d vs. 4d  | 1.016 | 0.3737 | 0.6422   | 0.3148 to 0.9696  | Yes | **** | <0.0001 |
|       |          | 0d vs. 5d  | 1.016 | 0.2213 | 0.7946   | 0.4672 to 1.122   | Yes | **** | <0.0001 |
|       |          | 0d vs. 6d  | 1.016 | 0.2066 | 0.8093   | 0.4819 to 1.137   | Yes | **** | <0.0001 |
|       |          | 0d vs. 1d  | 1.074 | 0.5822 | 0.4915   | 0.1641 to 0.8189  | Yes | **   | 0.0012  |
|       |          | 0d vs. 2d  | 1.074 | 0.4788 | 0.5949   | 0.2675 to 0.9223  | Yes | **** | <0.0001 |
|       |          | 0d vs. 3d  | 1.074 | 0.334  | 0.7398   | 0.4124 to 1.067   | Yes | **** | <0.0001 |
|       |          | 0d vs. 4d  | 1.074 | 0.384  | 0.6897   | 0.3623 to 1.017   | Yes | **** | <0.0001 |
|       |          | 0d vs. 5d  | 1.074 | 0.2486 | 0.8251   | 0.4977 to 1.153   | Yes | **** | <0.0001 |
|       |          | 0d vs. 6d  | 1.074 | 0.2737 | 0.8001   | 0.4727 to 1.127   | Yes | **** | <0.0001 |
|       | miR-150  | 0d vs. 1d  | 1.058 | 0.6004 | 0.4578   | 0.1304 to 0.7852  | Yes | **   | 0.0027  |
|       |          | 0d vs. 2d  | 1.058 | 0.4756 | 0.5826   | 0.2552 to 0.9100  | Yes | ***  | 0.0001  |
|       |          | 0d vs. 3d  | 1.058 | 0.3238 | 0.7344   | 0.4070 to 1.062   | Yes | **** | <0.0001 |
|       |          | 0d vs. 4d  | 1.058 | 0.4086 | 0.6496   | 0.3222 to 0.9770  | Yes | **** | <0.0001 |
|       |          | 0d vs. 5d  | 1.058 | 0.2321 | 0.8261   | 0.4987 to 1.154   | Yes | **** | <0.0001 |
|       |          | 0d vs. 6d  | 1.058 | 0.2612 | 0.797    | 0.4696 to 1.124   | Yes | **** | <0.0001 |
|       | let-7a   | 0d vs. 10d | 1.009 | 1.079  | -0.06976 | -0.4648 to 0.3253 | No  | ns   | 0.9974  |
|       |          | 0d vs. 20d | 1.009 | 1.044  | -0.03491 | -0.4300 to 0.3602 | No  | ns   | 0.9997  |
|       |          | 0d vs. 30d | 1.009 | 0.9954 | 0.01398  | -0.3811 to 0.4091 | No  | ns   | 0.9999  |
|       |          | 0d vs. 40d | 1.009 | 1.067  | -0.05762 | -0.4527 to 0.3375 | No  | ns   | 0.9994  |
|       |          | 0d vs. 50d | 1.009 | 0.9868 | 0.02256  | -0.3725 to 0.4176 | No  | ns   | 0.9998  |
|       |          | 0d vs. 60d | 1.009 | 1.052  | -0.04312 | -0.4382 to 0.3520 | No  | ns   | 0.9996  |
|       |          | 0d vs. 70d | 1.009 | 1.031  | -0.02209 | -0.4172 to 0.3730 | No  | ns   | 0.9998  |

|          |            |       |        |           |                   |    |    |         |
|----------|------------|-------|--------|-----------|-------------------|----|----|---------|
| miR-16   | 0d vs. 80d | 1.009 | 1.154  | -0.1447   | -0.5398 to 0.2504 | No | ns | 0.9032  |
|          | 0d vs. 90d | 1.009 | 1.081  | -0.07197  | -0.4670 to 0.3231 | No | ns | 0.9972  |
|          | 0d vs. 10d | 1.02  | 1.081  | -0.06083  | -0.4559 to 0.3343 | No | ns | 0.9994  |
|          | 0d vs. 20d | 1.02  | 1.132  | -0.1113   | -0.5064 to 0.2838 | No | ns | 0.9772  |
|          | 0d vs. 30d | 1.02  | 1.148  | -0.1272   | -0.5223 to 0.2679 | No | ns | 0.9503  |
|          | 0d vs. 40d | 1.02  | 1.07   | -0.0493   | -0.4444 to 0.3458 | No | ns | 0.9995  |
|          | 0d vs. 50d | 1.02  | 0.9764 | 0.04405   | -0.3510 to 0.4391 | No | ns | 0.9996  |
|          | 0d vs. 60d | 1.02  | 0.988  | 0.03245   | -0.3626 to 0.4275 | No | ns | 0.9997  |
|          | 0d vs. 70d | 1.02  | 1.118  | -0.09746  | -0.4925 to 0.2976 | No | ns | 0.9904  |
|          | 0d vs. 80d | 1.02  | 1.063  | -0.04237  | -0.4375 to 0.3527 | No | ns | 0.9996  |
| miR-125a | 0d vs. 90d | 1.02  | 0.8794 | 0.141     | -0.2541 to 0.5361 | No | ns | 0.9147  |
|          | 0d vs. 10d | 1.01  | 1.076  | -0.0661   | -0.4612 to 0.3290 | No | ns | 0.9993  |
|          | 0d vs. 20d | 1.01  | 1.103  | -0.09353  | -0.4886 to 0.3016 | No | ns | 0.9921  |
|          | 0d vs. 30d | 1.01  | 0.9474 | 0.06216   | -0.3329 to 0.4572 | No | ns | 0.9994  |
|          | 0d vs. 40d | 1.01  | 0.9989 | 0.01075   | -0.3843 to 0.4058 | No | ns | >0.9999 |
|          | 0d vs. 50d | 1.01  | 0.9302 | 0.07939   | -0.3157 to 0.4745 | No | ns | 0.9967  |
|          | 0d vs. 60d | 1.01  | 1.027  | -0.01752  | -0.4126 to 0.3776 | No | ns | 0.9999  |
|          | 0d vs. 70d | 1.01  | 0.9267 | 0.0829    | -0.3122 to 0.4780 | No | ns | 0.9964  |
|          | 0d vs. 80d | 1.01  | 1.115  | -0.1055   | -0.5006 to 0.2895 | No | ns | 0.9841  |
|          | 0d vs. 90d | 1.01  | 1.062  | -0.05223  | -0.4473 to 0.3429 | No | ns | 0.9995  |
| miR-150  | 0d vs. 10d | 1.014 | 1.082  | -0.06865  | -0.4637 to 0.3264 | No | ns | 0.9976  |
|          | 0d vs. 20d | 1.014 | 1.023  | -0.009831 | -0.4049 to 0.3853 | No | ns | >0.9999 |
|          | 0d vs. 30d | 1.014 | 1.021  | -0.007688 | -0.4028 to 0.3874 | No | ns | >0.9999 |

|            |       |       |           |                   |    |    |         |
|------------|-------|-------|-----------|-------------------|----|----|---------|
| 0d vs. 40d | 1.014 | 1.04  | -0.02661  | -0.4217 to 0.3685 | No | ns | 0.9997  |
| 0d vs. 50d | 1.014 | 1.005 | 0.008576  | -0.3865 to 0.4037 | No | ns | >0.9999 |
| 0d vs. 60d | 1.014 | 1.016 | -0.002271 | -0.3974 to 0.3928 | No | ns | >0.9999 |
| 0d vs. 70d | 1.014 | 1.011 | 0.002163  | -0.3929 to 0.3972 | No | ns | >0.9999 |
| 0d vs. 80d | 1.014 | 1.019 | -0.005085 | -0.4002 to 0.3900 | No | ns | >0.9999 |
| 0d vs. 90d | 1.014 | 1.074 | -0.06008  | -0.4552 to 0.3350 | No | ns | 0.9994  |

\*P < 0.05, \*\*P < 0.01, \*\*\*P < 0.001, \*\*\*\*P < 0.0001, ns: nonsignificant.

**Table S10 Statistical analysis information of four glycosylated EV miRNAs after freeze-thaw.**

| miRNAs   | Mean 1 | Mean 2 | Mean Diff. | 95.00% CI of diff. | Below threshold? | Summary | Adjusted P Value |
|----------|--------|--------|------------|--------------------|------------------|---------|------------------|
| let-7a   | 1.025  | 0.308  | 0.7168     | 0.2300 to 1.204    | Yes              | **      | 0.0031           |
| miR-16   | 1.016  | 0.5257 | 0.4902     | 0.003371 to 0.9771 | Yes              | *       | 0.0481           |
| miR-125a | 1.044  | 0.3233 | 0.7205     | 0.2336 to 1.207    | Yes              | **      | 0.003            |
| miR-150  | 1.026  | 0.3028 | 0.7236     | 0.2367 to 1.210    | Yes              | **      | 0.0029           |

\*P < 0.05, \*\*P < 0.01.

**Table S11 Statistical analysis information of four glycosylated EV miRNAs using three groups of protectants at 25°C.**

| miRNAs | Groups       | Comparisons | Mean 1 | Mean 2 | Mean Diff. | 95.00% CI of diff. | Below threshold? | Summary | Adjusted P Value |
|--------|--------------|-------------|--------|--------|------------|--------------------|------------------|---------|------------------|
| let-7a | Protectant 1 | 0h vs. 6h   | 1.014  | 0.8583 | 0.1556     | -0.1736 to 0.4849  | No               | ns      | 0.444            |
|        |              | 0h vs. 12h  | 1.014  | 0.9304 | 0.08345    | -0.2458 to 0.4127  | No               | ns      | 0.7779           |

|          |               |            |       |        |          |                    |     |     |        |
|----------|---------------|------------|-------|--------|----------|--------------------|-----|-----|--------|
| miR-16   | Protectant 2  | 0h vs. 6h  | 1.008 | 0.8528 | 0.1551   | -0.1741 to 0.4843  | No  | ns  | 0.4462 |
|          |               | 0h vs. 12h | 1.008 | 0.9845 | 0.02338  | -0.3059 to 0.3526  | No  | ns  | 0.9798 |
|          | Protectant 3  | 0h vs. 6h  | 1.025 | 0.4859 | 0.5395   | 0.2103 to 0.8688   | Yes | **  | 0.0015 |
|          |               | 0h vs. 12h | 1.025 | 0.57   | 0.4554   | 0.1261 to 0.7846   | Yes | **  | 0.0065 |
|          | Control group | 0h vs. 6h  | 1.015 | 0.645  | 0.3697   | 0.04045 to 0.6989  | Yes | *   | 0.0267 |
|          |               | 0h vs. 12h | 1.015 | 0.4818 | 0.5329   | 0.2036 to 0.8621   | Yes | **  | 0.0017 |
|          | Protectant 1  | 0h vs. 6h  | 1.017 | 0.9907 | 0.02674  | -0.3385 to 0.3919  | No  | ns  | 0.9786 |
|          |               | 0h vs. 12h | 1.017 | 0.9081 | 0.1093   | -0.2559 to 0.4745  | No  | ns  | 0.7077 |
|          | Protectant 2  | 0h vs. 6h  | 1.022 | 0.9438 | 0.07813  | -0.2871 to 0.4433  | No  | ns  | 0.8346 |
|          |               | 0h vs. 12h | 1.022 | 1.047  | -0.02466 | -0.3899 to 0.3405  | No  | ns  | 0.9817 |
|          | Protectant 3  | 0h vs. 6h  | 1.008 | 0.6085 | 0.3998   | 0.03464 to 0.7651  | Yes | *   | 0.0309 |
|          |               | 0h vs. 12h | 1.008 | 0.5603 | 0.4481   | 0.08285 to 0.8133  | Yes | *   | 0.0154 |
| miR-125a | Control group | 0h vs. 6h  | 1.017 | 0.7532 | 0.2638   | -0.1014 to 0.6290  | No  | ns  | 0.1779 |
|          |               | 0h vs. 12h | 1.017 | 0.6134 | 0.4037   | 0.03848 to 0.7689  | Yes | *   | 0.0293 |
|          | Protectant 1  | 0h vs. 6h  | 1.017 | 1.04   | -0.02279 | -0.3312 to 0.2856  | No  | ns  | 0.9781 |
|          |               | 0h vs. 12h | 1.017 | 1.104  | -0.08627 | -0.3946 to 0.2221  | No  | ns  | 0.7384 |
|          | Protectant 2  | 0h vs. 6h  | 1.01  | 0.9586 | 0.05184  | -0.2565 to 0.3602  | No  | ns  | 0.8934 |
|          |               | 0h vs. 12h | 1.01  | 0.9035 | 0.1069   | -0.2014 to 0.4153  | No  | ns  | 0.6333 |
|          | Protectant 3  | 0h vs. 6h  | 1.023 | 0.7421 | 0.2812   | -0.02716 to 0.5896 | No  | ns  | 0.0766 |
|          |               | 0h vs. 12h | 1.023 | 0.4768 | 0.5466   | 0.2382 to 0.8549   | Yes | *** | 0.0007 |
|          | Control group | 0h vs. 6h  | 1.014 | 0.8268 | 0.1868   | -0.1215 to 0.4952  | No  | ns  | 0.2812 |
|          |               | 0h vs. 12h | 1.014 | 0.4278 | 0.5858   | 0.2775 to 0.8942   | Yes | *** | 0.0003 |
|          | Protectant 1  | 0h vs. 6h  | 1.01  | 0.9195 | 0.09005  | -0.1953 to 0.3754  | No  | ns  | 0.6825 |
|          |               | 0h vs. 12h | 1.01  | 0.9195 | 0.09005  | -0.1953 to 0.3754  | No  | ns  | 0.6825 |

|               |            |       |        |         |                    |     |      |         |
|---------------|------------|-------|--------|---------|--------------------|-----|------|---------|
| Protectant 2  | 0h vs. 12h | 1.01  | 0.8158 | 0.1937  | -0.09166 to 0.4791 | No  | ns   | 0.2123  |
|               | 0h vs. 6h  | 1.01  | 1.005  | 0.0052  | -0.2802 to 0.2906  | No  | ns   | 0.9986  |
|               | 0h vs. 12h | 1.01  | 0.9893 | 0.02054 | -0.2648 to 0.3059  | No  | ns   | 0.9792  |
| Protectant 3  | 0h vs. 6h  | 1.012 | 0.3981 | 0.6143  | 0.3289 to 0.8997   | Yes | **** | <0.0001 |
|               | 0h vs. 12h | 1.012 | 0.3215 | 0.6908  | 0.4054 to 0.9762   | Yes | **** | <0.0001 |
| Control group | 0h vs. 6h  | 1.008 | 0.4506 | 0.5575  | 0.2721 to 0.8429   | Yes | ***  | 0.0002  |
|               | 0h vs. 12h | 1.008 | 0.2759 | 0.7321  | 0.4467 to 1.017    | Yes | **** | <0.0001 |

\*P < 0.05, \*\*P < 0.01, \*\*\*P < 0.001, \*\*\*\*P < 0.0001, ns: nonsignificant.

**Table S12 Statistical analysis information of four glycosylated EV miRNAs using three different plasma collection vessels at 25°C.**

| Groups         | miRNAs | Comparisons | Mean 1 | Mean 2 | Mean Diff. | 95.00% CI of diff. | Below threshold? | Summary | Adjusted P Value |
|----------------|--------|-------------|--------|--------|------------|--------------------|------------------|---------|------------------|
| Sodium citrate | let-7a | 0h vs. 4h   | 1.057  | 1.754  | -0.6975    | -2.822 to 1.428    | No               | ns      | 0.9106           |
|                |        | 0h vs. 8h   | 1.057  | 2.021  | -0.9638    | -3.089 to 1.161    | No               | ns      | 0.7075           |
|                |        | 0h vs. 16h  | 1.057  | 2.024  | -0.9672    | -3.092 to 1.158    | No               | ns      | 0.7045           |
|                |        | 0h vs. 24h  | 1.057  | 1.925  | -0.8682    | -2.993 to 1.257    | No               | ns      | 0.7907           |
|                |        | 0h vs. 48h  | 1.057  | 1.991  | -0.9335    | -3.059 to 1.191    | No               | ns      | 0.7346           |
|                |        | 0h vs. 72h  | 1.057  | 4.278  | -3.221     | -5.346 to -1.096   | Yes              | **      | 0.001            |
|                |        | 0h vs. 120h | 1.057  | 12.57  | -11.51     | -13.64 to -9.387   | Yes              | ****    | <0.0001          |
|                | miR-16 | 0h vs. 4h   | 1.027  | 1.261  | -0.2338    | -3.612 to 3.145    | No               | ns      | 0.9997           |
|                |        | 0h vs. 8h   | 1.027  | 1.277  | -0.2505    | -3.629 to 3.128    | No               | ns      | 0.9997           |
|                |        | 0h vs. 16h  | 1.027  | 1.535  | -0.5078    | -3.886 to 2.871    | No               | ns      | 0.9978           |

|      |          |             |       |        |          |                   |     |      |         |
|------|----------|-------------|-------|--------|----------|-------------------|-----|------|---------|
| EDTA | miR-125a | 0h vs. 24h  | 1.027 | 1.769  | -0.7421  | -4.121 to 2.637   | No  | ns   | 0.9884  |
|      |          | 0h vs. 48h  | 1.027 | 2.204  | -1.177   | -4.556 to 2.201   | No  | ns   | 0.8848  |
|      |          | 0h vs. 72h  | 1.027 | 5.257  | -4.23    | -7.608 to -0.8511 | Yes | **   | 0.0084  |
|      |          | 0h vs. 120h | 1.027 | 9.607  | -8.58    | -11.96 to -5.201  | Yes | **** | <0.0001 |
|      |          | 0h vs. 4h   | 1.047 | 0.8626 | 0.1846   | -2.445 to 2.815   | No  | ns   | 0.9997  |
|      |          | 0h vs. 8h   | 1.047 | 0.8768 | 0.1703   | -2.460 to 2.800   | No  | ns   | 0.9997  |
|      |          | 0h vs. 16h  | 1.047 | 0.8399 | 0.2072   | -2.423 to 2.837   | No  | ns   | 0.9997  |
|      |          | 0h vs. 24h  | 1.047 | 0.7628 | 0.2843   | -2.346 to 2.914   | No  | ns   | 0.9996  |
|      |          | 0h vs. 48h  | 1.047 | 1.045  | 0.002269 | -2.628 to 2.632   | No  | ns   | >0.9999 |
|      |          | 0h vs. 72h  | 1.047 | 1.228  | -0.1807  | -2.811 to 2.449   | No  | ns   | 0.9997  |
|      |          | 0h vs. 120h | 1.047 | 2.582  | -1.535   | -4.165 to 1.095   | No  | ns   | 0.4578  |
|      | miR-150  | 0h vs. 4h   | 1.057 | 0.8778 | 0.1788   | -2.212 to 2.570   | No  | ns   | 0.9997  |
|      |          | 0h vs. 8h   | 1.057 | 0.8819 | 0.1747   | -2.217 to 2.566   | No  | ns   | 0.9997  |
|      |          | 0h vs. 16h  | 1.057 | 0.8141 | 0.2425   | -2.149 to 2.634   | No  | ns   | 0.9996  |
|      |          | 0h vs. 24h  | 1.057 | 0.7406 | 0.316    | -2.075 to 2.707   | No  | ns   | 0.9994  |
|      |          | 0h vs. 48h  | 1.057 | 1.081  | -0.02407 | -2.415 to 2.367   | No  | ns   | >0.9999 |
|      |          | 0h vs. 72h  | 1.057 | 1.155  | -0.09794 | -2.489 to 2.293   | No  | ns   | 0.9999  |
|      |          | 0h vs. 120h | 1.057 | 2.594  | -1.537   | -3.928 to 0.8542  | No  | ns   | 0.3583  |
|      | let-7a   | 0h vs. 4h   | 1.046 | 1.036  | 0.01033  | -2.115 to 2.135   | No  | ns   | >0.9999 |
|      |          | 0h vs. 8h   | 1.046 | 0.8907 | 0.1557   | -1.969 to 2.281   | No  | ns   | 0.9997  |
|      |          | 0h vs. 16h  | 1.046 | 1.581  | -0.5342  | -2.659 to 1.591   | No  | ns   | 0.975   |
|      |          | 0h vs. 24h  | 1.046 | 1.557  | -0.5105  | -2.635 to 1.615   | No  | ns   | 0.9803  |
|      |          | 0h vs. 48h  | 1.046 | 1.132  | -0.08593 | -2.211 to 2.039   | No  | ns   | 0.9999  |

|          |             |       |        |          |                  |     |      |         |
|----------|-------------|-------|--------|----------|------------------|-----|------|---------|
| miR-16   | 0h vs. 72h  | 1.046 | 1.523  | -0.477   | -2.602 to 1.648  | No  | ns   | 0.9867  |
|          | 0h vs. 120h | 1.046 | 1.633  | -0.5868  | -2.712 to 1.538  | No  | ns   | 0.9598  |
|          | 0h vs. 4h   | 1.06  | 1.094  | -0.03415 | -3.413 to 3.345  | No  | ns   | >0.9999 |
|          | 0h vs. 8h   | 1.06  | 1.188  | -0.1278  | -3.506 to 3.251  | No  | ns   | 0.9999  |
|          | 0h vs. 16h  | 1.06  | 2.918  | -1.858   | -5.237 to 1.521  | No  | ns   | 0.5203  |
|          | 0h vs. 24h  | 1.06  | 3.705  | -2.645   | -6.024 to 0.7333 | No  | ns   | 0.1815  |
|          | 0h vs. 48h  | 1.06  | 2.484  | -1.424   | -4.802 to 1.955  | No  | ns   | 0.7678  |
|          | 0h vs. 72h  | 1.06  | 3.348  | -2.288   | -5.667 to 1.091  | No  | ns   | 0.3069  |
| miR-125a | 0h vs. 120h | 1.06  | 1.28   | -0.2196  | -3.598 to 3.159  | No  | ns   | 0.9997  |
|          | 0h vs. 4h   | 1.008 | 0.5845 | 0.4232   | -2.207 to 3.053  | No  | ns   | 0.9975  |
|          | 0h vs. 8h   | 1.008 | 0.7972 | 0.2105   | -2.419 to 2.841  | No  | ns   | 0.9997  |
|          | 0h vs. 16h  | 1.008 | 0.8454 | 0.1623   | -2.468 to 2.792  | No  | ns   | 0.9997  |
|          | 0h vs. 24h  | 1.008 | 1.104  | -0.09591 | -2.726 to 2.534  | No  | ns   | 0.9999  |
|          | 0h vs. 48h  | 1.008 | 11.83  | -10.82   | -13.45 to -8.194 | Yes | **** | <0.0001 |
|          | 0h vs. 72h  | 1.008 | 9.667  | -8.659   | -11.29 to -6.029 | Yes | **** | <0.0001 |
|          | 0h vs. 120h | 1.008 | 6.076  | -5.068   | -7.698 to -2.438 | Yes | **** | <0.0001 |
| miR-150  | 0h vs. 4h   | 1.013 | 0.5855 | 0.4276   | -1.964 to 2.819  | No  | ns   | 0.9953  |
|          | 0h vs. 8h   | 1.013 | 0.7818 | 0.2312   | -2.160 to 2.622  | No  | ns   | 0.9996  |
|          | 0h vs. 16h  | 1.013 | 0.8976 | 0.1155   | -2.276 to 2.507  | No  | ns   | 0.9998  |
|          | 0h vs. 24h  | 1.013 | 1.051  | -0.03789 | -2.429 to 2.353  | No  | ns   | >0.9999 |
|          | 0h vs. 48h  | 1.013 | 10.42  | -9.406   | -11.80 to -7.015 | Yes | **** | <0.0001 |
|          | 0h vs. 72h  | 1.013 | 10.34  | -9.323   | -11.71 to -6.932 | Yes | **** | <0.0001 |
|          | 0h vs. 120h | 1.013 | 6.347  | -5.334   | -7.725 to -2.942 | Yes | **** | <0.0001 |

|         |          |             |       |        |         |                 |    |    |        |
|---------|----------|-------------|-------|--------|---------|-----------------|----|----|--------|
| Lakebio | let-7a   | 0h vs. 4h   | 1.099 | 0.9258 | 0.1732  | -1.952 to 2.298 | No | ns | 0.9997 |
|         |          | 0h vs. 8h   | 1.099 | 0.8292 | 0.2698  | -1.855 to 2.395 | No | ns | 0.9995 |
|         |          | 0h vs. 16h  | 1.099 | 0.8795 | 0.2195  | -1.905 to 2.345 | No | ns | 0.9996 |
|         |          | 0h vs. 24h  | 1.099 | 0.7345 | 0.3645  | -1.761 to 2.489 | No | ns | 0.9971 |
|         |          | 0h vs. 48h  | 1.099 | 1.483  | -0.3835 | -2.509 to 1.741 | No | ns | 0.9951 |
|         |          | 0h vs. 72h  | 1.099 | 1.031  | 0.06832 | -2.057 to 2.193 | No | ns | 0.9999 |
|         |          | 0h vs. 120h | 1.099 | 1.313  | -0.2142 | -2.339 to 1.911 | No | ns | 0.9996 |
|         | miR-16   | 0h vs. 4h   | 1.018 | 0.765  | 0.2529  | -3.126 to 3.632 | No | ns | 0.9997 |
|         |          | 0h vs. 8h   | 1.018 | 0.8629 | 0.155   | -3.224 to 3.534 | No | ns | 0.9998 |
|         |          | 0h vs. 16h  | 1.018 | 0.8178 | 0.2001  | -3.179 to 3.579 | No | ns | 0.9998 |
|         |          | 0h vs. 24h  | 1.018 | 0.7974 | 0.2205  | -3.158 to 3.599 | No | ns | 0.9997 |
|         |          | 0h vs. 48h  | 1.018 | 2.837  | -1.819  | -5.198 to 1.559 | No | ns | 0.542  |
|         |          | 0h vs. 72h  | 1.018 | 2.709  | -1.691  | -5.070 to 1.688 | No | ns | 0.6159 |
|         |          | 0h vs. 120h | 1.018 | 2.04   | -1.022  | -4.401 to 2.357 | No | ns | 0.9378 |
|         | miR-125a | 0h vs. 4h   | 1.021 | 0.6966 | 0.3241  | -2.306 to 2.954 | No | ns | 0.9995 |
|         |          | 0h vs. 8h   | 1.021 | 0.787  | 0.2337  | -2.396 to 2.864 | No | ns | 0.9997 |
|         |          | 0h vs. 16h  | 1.021 | 0.7053 | 0.3153  | -2.315 to 2.945 | No | ns | 0.9995 |
|         |          | 0h vs. 24h  | 1.021 | 0.8841 | 0.1366  | -2.493 to 2.767 | No | ns | 0.9998 |
|         |          | 0h vs. 48h  | 1.021 | 0.8581 | 0.1626  | -2.467 to 2.793 | No | ns | 0.9997 |
|         |          | 0h vs. 72h  | 1.021 | 0.8653 | 0.1554  | -2.475 to 2.785 | No | ns | 0.9998 |
|         |          | 0h vs. 120h | 1.021 | 0.9451 | 0.07559 | -2.554 to 2.706 | No | ns | 0.9999 |
|         | miR-150  | 0h vs. 4h   | 1.021 | 0.7578 | 0.2634  | -2.128 to 2.655 | No | ns | 0.9996 |
|         |          | 0h vs. 8h   | 1.021 | 0.8685 | 0.1527  | -2.239 to 2.544 | No | ns | 0.9997 |



|             |       |        |        |                 |    |    |         |
|-------------|-------|--------|--------|-----------------|----|----|---------|
| 0h vs. 16h  | 1.021 | 0.7034 | 0.3178 | -2.073 to 2.709 | No | ns | 0.9994  |
| 0h vs. 24h  | 1.021 | 0.9013 | 0.1199 | -2.271 to 2.511 | No | ns | 0.9998  |
| 0h vs. 48h  | 1.021 | 0.8496 | 0.1717 | -2.220 to 2.563 | No | ns | 0.9997  |
| 0h vs. 72h  | 1.021 | 0.8893 | 0.1319 | -2.259 to 2.523 | No | ns | 0.9998  |
| 0h vs. 120h | 1.021 | 0.9961 | 0.0251 | -2.366 to 2.416 | No | ns | >0.9999 |

\*\*P < 0.01, \*\*\*\*P < 0.0001, ns: nonsignificant.
